# Supplementary material for: Epidemiology and genetic diversity of invasive Neisseria meningitidis strains circulating in Portugal from 2003 to 2020
Source: PubMed Central journal article supplement (PMC11300501; doi:10.1007/s10123-023-00463-w), 2023-12-07
Supplement: 10123_2023_463_MOESM4_ESM.pdf [file 10123_2023_463_MOESM4_ESM.pdf]

## **VigLab\_DIM\_Network Group**

Cristina Toscano<sup>6</sup>, Elsa Gonçalves<sup>6</sup>, José Melo Cristino<sup>7</sup>, Maria Dinah Carvalho<sup>7</sup>, Alberta Faustino<sup>8</sup>, Aurélio Mesquita<sup>8</sup>, Luísa M. Vieira<sup>9</sup>, Cláudia MAC. Branco<sup>9</sup>, Maria Favila Menezes<sup>10</sup>, Maria José Rego de Sousa<sup>10</sup>, José Diogo<sup>11</sup>, Fátima Vale<sup>12</sup>, Rita Gralha<sup>12</sup>, Valquíria Alves<sup>13</sup>, Antónia Read<sup>13</sup>, Fátima Silva<sup>14</sup>, Adriana Pedrosa<sup>14</sup>, Isabel Vale<sup>15</sup>, Maria João Tomás<sup>15</sup>, Paulo Martinho<sup>16</sup>, Gema Mira<sup>16</sup>, Paula Mota<sup>17</sup>, Hermínia Marques<sup>17</sup>, Ezequiel Moreira<sup>18</sup>, Carla Ferreira<sup>18</sup>, Gabriela Abreu<sup>19</sup>, Aurélia Selaru<sup>19</sup>, Patrícia Amantegui Ibarzabal<sup>20</sup>, Paula Cristina J. Gouveia Pestana<sup>20</sup>, Sandra Vieira<sup>21</sup>, Mota Freitas<sup>21</sup>, Margarida Feijó Pinto<sup>22</sup>, <sup>23</sup>Ana Filipa Resende, <sup>23</sup>Andreia Sofia Bernardo, Rui Ferreira<sup>24</sup>, Henrique Oliveira<sup>25</sup>, Fernando Rodrigues<sup>25</sup>, Ana Filipa M. Vicente<sup>26</sup>, Nuno Canhoto<sup>26</sup>, Manuela Ribeiro<sup>27</sup>, Angélica Ramos<sup>27</sup>, Gina Marrão<sup>28</sup>, <sup>29</sup>Maria Calle Velles, <sup>29</sup>Mariana Viana, <sup>30</sup>Adriana Coutinho, <sup>30</sup>Elsa Lopes

<sup>6</sup> Serviço de Patologia Clínica, Centro Hospitalar de Lisboa Ocidental, EPE

<sup>7</sup> Serviço de Patologia Clínica, Centro Hospitalar Universitário Lisboa Norte, EPE

<sup>8</sup> Serviço de Patologia Clínica, Hospital de Braga, EPE

<sup>9</sup> Unidade de Genética e Patologias Moleculares, Hospital Divino Espírito Santo de Ponta Delgada, EPE

<sup>10</sup> Serviço de Patologia Clínica, Centro de Medicina Laboratorial Germano de Sousa, Hospital CUF Descobertas

<sup>11</sup> Serviço de Patologia Clínica, Hospital Garcia de Orta, EPE

<sup>12</sup> Serviço de Patologia Clínica Unidade Local de Saúde da Guarda, EPE

<sup>13</sup> Serviço de Patologia Clínica, Unidade Local de Saúde de Matosinhos, EPE

<sup>14</sup> Serviço de Patologia Clínica, Centro Hospitalar de Entre o Douro e Vouga, EPE, Hospital de São Sebastião

<sup>15</sup> Serviço de Patologia Clínica, Centro Hospitalar Tondela Viseu, EPE

<sup>16</sup> Serviço de Patologia Clínica, Unidade Local de Saúde do Norte Alentejano, EPE, Hospital Santa Luzia de Elvas

<sup>17</sup> Serviço de Patologia Clínica, Hospital da Senhora de Oliveira – Guimarães, EPE

<sup>18</sup> Serviço de Patologia Clínica, Centro Hospitalar do Médio Ave, EPE

<sup>19</sup> Serviço de Patologia Clínica, Centro Hospitalar de Vila Nova de Gaia/Espinho, EPE

<sup>20</sup> Serviço de Patologia Clínica, Centro Hospitalar Cova da Beira EPE, Hospital Pêro da Covilhã

<sup>21</sup> Serviço de Patologia Clínica, Unidade Local de Saúde do Alto Minho, EPE, Hospital de Santa Luzia

<sup>22</sup> Serviço de Patologia Clínica, Centro Hospitalar Universitário Lisboa Central, EPE

<sup>23</sup> Serviço de Patologia Clínica, Centro Hospitalar de Setúbal, EPE

<sup>24</sup>Serviço de Patologia Clínica, Centro Hospitalar Universitário do Algarve, EPE, Hospital de Faro.

<sup>25</sup>Serviço de Patologia Clínica, Centro Hospitalar e Universitário de Coimbra, EPE

<sup>26</sup>Serviço de Patologia Clínica - Serviço de Saúde da Região Autónoma da Madeira (SESARAM), Hospital Dr. Nélio Mendonça

<sup>27</sup>Serviço de Patologia Clínica, Centro Hospitalar Universitário de São João, EPE

<sup>28</sup>Serviço de Patologia Clínica, Centro Hospitalar de Leiria, EPE

<sup>29</sup>Serviço de Patologia Clínica, Centro Hospitalar do Tâmega e Sousa, EPE

<sup>30</sup> Serviço de Patologia Clínica, Hospital do Espírito Santo de Évora, EPE
